# Supplementary material
Source: publisher site journal article supplement (https://www.dovepress.com/article/334827)
Supplement: Supplementary file 1 [file get_supplementary_file.php]

**Appendix 1.** Patient survey of decision locus of control

| Consider a recent treatment decision that you made for your prostate cancer. Describe how this decision was made by choosing a statement from the list to the right: | Your doctors made the decision with little or no input from you. |
| --- | --- |
| Your doctors made the decision after seriously considering your opinion. |
| You and your doctors made the decision together. |
| You made the decision after seriously considering your doctor’s opinion. |
| You made the treatment decision with little or no input from your doctors. |

**Appendix 2.** Survey of new information learned and information influencing treatment decisions

| **Consider a recent treatment decision that you made for your prostate cancer treatment and the outcome of that decision. Answer the following questions about that decision using the scale from 1-5, with 1 being "Definitely" and 5 being "Not at all."** | | | | | |
| --- | --- | --- | --- | --- | --- |
| When you made the decision, did you learn new information that you did not know before about: | | | | | |
|  | Definitely | Somewhat | Neutral | Not very much | Not at all |
| a) how well the treatment works in patients like you |  |  |  |  |  |
| b) side effects of treatment |  |  |  |  |  |
| c) how much the treatment will cost out of pocket |  |  |  |  |  |
| d) how often you need to return for follow-up during this treatment |  |  |  |  |  |
| Did any of the following that you talked about with your doctor influence the treatment decision? | | | | | |
|  | Definitely | Somewhat | Neutral | Not very much | Not at all |
| a) how well the treatment works in patients like you |  |  |  |  |  |
| b) side effects of treatment |  |  |  |  |  |
| c) how much the treatment will cost out of pocket |  |  |  |  |  |
| d) how often you need to return for follow-up during this treatment |  |  |  |  |  |

**Appendix 3.** Caregiver survey of decision locus of control

| Consider a recent treatment decision that your loved one made for his prostate cancer. Describe how this decision was made by choosing a statement from the list to the right: | The doctor made the decision with little or no input from the patient. |
| --- | --- |
| The doctor made the decision after seriously considering the patient’s opinion. |
| The patient and the doctor made the decision together. |
| The patient made the decision after seriously considering the doctor’s opinion. |
| The patient made the treatment decision with little or no input from the doctor. |

**Appendix 4.** Physician survey of decision locus of control

| Consider a recent treatment decision that you and a patient made for his prostate cancer. Describe how this decision was made by choosing a statement from the list to the right: | The patient made the decision with little or no input from me. |
| --- | --- |
| The patient made the decision after seriously considering my opinion. |
| You and the patient made the decision together. |
| You made the decision after seriously considering the patient’s opinion. |
| You made the decision with little or no input from the patient. |
